# Supplementary material
Source: MDPI journal article supplement (https://www.mdpi.com/search?q=viruses-11-00946)
Supplement: s001 [file viruses-11-00946-s001.pdf]

**Figure S1**

Alignment of the nucleotide sequences of the region from the p4.7 to p12.7 genes of the ECoV NC99, Tokachi09, Obihiro12-1, Obihiro12-2, 11V11708/IRL/2011 and 13V08313/IRL/2013. Minus signs (-) indicate missing nucleotides and asterisks (\*) indicate conserved nucleotides.

|                   | <b>p4.7 gene</b>                                            |     |
|-------------------|-------------------------------------------------------------|-----|
|                   | —————>                                                      |     |
| 11V11708/IRL/2011 | ATGACGATTAATTTGTCATTT-AACTATTTTATATGA—————                  | 37  |
| 13V08313/IRL/2013 | ATGACGATTAATTTGTCATTT-AACTATTTTATATGA—————                  | 37  |
| Obihiro12-1       | ATGACGATTAATTTGTCATTT-AACTATTTTATATGA—————                  | 37  |
| Obihiro12-2       | ATGACGATTAATTTGTCATTT-AACTATTTTATATGA—————                  | 37  |
| NC99              | ATGACGATTAATTTGTCATTTTAACTATTTTATATGACCTGCCTTTGTGGGTAAACTT  | 60  |
| Tokachi09         | ATGACGATTAATTT—————                                         | 14  |
|                   | *****                                                       |     |
|                   | —————>                                                      |     |
| 11V11708/IRL/2011 | ——CAACCACTCATGGGTGTAATAATTAATACTAGTACAGCTCTACATTGGC——TT     | 90  |
| 13V08313/IRL/2013 | ——CAACCACTCATGGGTGTAATAATTAATACTAGTACAGCTCTACATTGGC——TT     | 90  |
| Obihiro12-1       | ——CAACCACTCATGGGTGTAC——TATTAATACTAGTACAGCTCTACATTGGC——TT    | 87  |
| Obihiro12-2       | ——CAACCACTCATGGGTGTAC——TATTAATACTAGTACAGCTCTACATTGGC——TT    | 87  |
| NC99              | GCTACAACCACTCATGGGTGTAATAATTAATACTAGTACAGCTCTACATTGGCTTATT  | 120 |
| Tokachi09         | —————                                                       | 14  |
|                   | ->                                                          |     |
| 11V11708/IRL/2011 | TAGGCATTTT————GTTAACACAGCCACCATCGGGTTAAACCGGTTTATGGTGCTAG   | 143 |
| 13V08313/IRL/2013 | TAGGCATTTT————GTTAACACAGCCACCATCGGGTTAAACCGGTTTATGGTGCTAG   | 143 |
| Obihiro12-1       | TAGGCATTTT————GTTAACACAGCCACCATCGGGTTAAACCGGTTTATGGTGCTAG   | 140 |
| Obihiro12-2       | TAGGCATTTT————GTTAACACAGCCACCATCGGGTTAAACCGGTTTATGGTGCTAG   | 140 |
| NC99              | TAGGCATTTTATATGTGTTAACACCACCACCATCGGGTTAAACCGGTTTATGGTGCTAG | 180 |
| Tokachi09         | —————                                                       | 14  |
| 11V11708/IRL/2011 | TGCTAAATTATATTTTGTATACTTTATAACTTTAAGCATTTGCTAAAGTTTTTAAGGCC | 203 |
| 13V08313/IRL/2013 | TGCTAAATTATATTTTGTATACTTTATAACTTTAAGCATTTGCTAAAGTTTTTAAGGCC | 203 |
| Obihiro12-1       | TGCTAAATTATATTTTGTATACTTTATAACTTTAAGCATTTGCTAAAGTTTTTAAGGCC | 200 |
| Obihiro12-2       | TGCTAAATTATATTTTGTATACTTTATAACTTTAAGCATTTGCTAAAGTTTTTAAGGCC | 200 |
| NC99              | TGCCAAATTATATTTTGTATACTTTATAACTTTAAGCAGTTGCTAAAGTTCTTAAGGCC | 240 |
| Tokachi09         | —————ATACTTTATAACTTTAAGCATTTGCTAAAGTTCTTAAGGCC              | 55  |
|                   | *****                                                       |     |

p12.7 gene

11V11708/IRL/2011 AACCCCTTATTAATGGACATCTGGAGACCTGAGAGGAAATTTCTCCGTTTTACTAATGGAT 263  
13V08313/IRL/2013 AACCCCTTATTAATGGACATCTGGAGACCTGAGAGGAAATTTCTCCGTTTTACTAACGGAT 263  
Obihiro12-1 AACCCCTTATTAATGGACATCTGGAGACCTGAGAGGAAATTTCTCCGTTTTACTAACGGAT 260  
Obihiro12-2 AACCCCTTATTAATGGACATCTGGAGACCTGAGAGGAAATTTCTCCGTTTTACTAACGGAT 260  
NC99 AACCCCTTATTAATGGACATCTGGAGACCTGAGAGGAAATTTCTCCGTTTTACTAACGGAT 300  
Tokachi09 AACCCCTTATTAATGGACATCTGGAGACCTGAGAGGAAATTTCTCCGTTTTACTAACGGAT 115

\*\*\*\*\*

11V11708/IRL/2011 TTAACGTCCAGAATTAGAAGATGTCTGTTTTAAATTTAATTACCAATTGCCTAAAGTAG 323  
13V08313/IRL/2013 TTAACGTCCAGAATTAGAAGATGTCTGTTTTAAATTTAATTACCAATTGCCTAAAGTAG 323  
Obihiro12-1 TTAACGTCCAGAATTAGAAGATGTCTGTTTTAAATTTAATTACCAATTGCCTAAAGTAG 320  
Obihiro12-2 TTAACGTCCAGAATTAGAAGATGTCTGTTTTAAATTTAATTACCAATTGCCTAAAGTAG 320  
NC99 TTAACGTCCAGAATTAGAAGATGTCTGTTTTAAATTTAATTACCAATTGCCTAAAGTAG 360  
Tokachi09 TTAATGTCCAGAATTAGAAGATGTCTGTTTTAAATTTAATTACCAATTCCTAAAGTAG 175

\*\*\*\* \*\*\*\*\*

11V11708/IRL/2011 GATATTGTAGAGTTCCTAATTATGCTTGGTGTGCGTAATCAAGGTAGCTTTTGTGCTACAT 383  
13V08313/IRL/2013 GATATTGTAGAGTTCCTAATTATGCTTGGTGTGCGTAATCAAGGTAGCTTTTGTGCTACAT 383  
Obihiro12-1 GATATTGTAGAGTTCCTAATTATGCTTGGTGTGCGTAATCAAGGTAGCTTTTGTGCTACAT 380  
Obihiro12-2 GATATTGTAGAGTTCCTAATTATGCTTGGTGTGCGTAATCAAGGTAGCTTTTGTGCTACAT 380  
NC99 GATATTGTAGAGTTCCTAATTATGCTTGGTGTGCGTAATCAAGGTAGCTTTTGTGCTACAT 420  
Tokachi09 GATATTGTAGAGTTCCTAATTATGCTTGGTGTGCGTAATCAAGGTAGCTTTTGTGCTACAT 235

\*\*\*\*\*

11V11708/IRL/2011 TTACCCTTTACGGCAAATCCAAACATTATGATAAATATTTTGAATAAATACTGGTTTCA 443  
13V08313/IRL/2013 TTACCCTTTACGGCAAATCCAAACATTATGATAAATATTTTGAATAAATACTGGTTTCA 443  
Obihiro12-1 TTACCCTTTACGGCAAATCCAAACATTATGATAAATATTTTGAATAAATACTGGTTTCA 440  
Obihiro12-2 TTACCCTTTACGGCAAATCCAAACATTATGATAAATATTTTGAATAAATACTGGTTTCA 440  
NC99 TCACCCTTTACGGCAAATCCAAACATTATGATAAATATTTTGAATAAATACTGGTTTCA 480  
Tokachi09 TTACCCTTTACGGCAAATCCAAACATTATGATAAATATTTTGAATAAATACTGGTTTCA 295

\* \*\*\*\*\*

11V11708/IRL/2011 CAGCGTTCGCCAATACTATAGAGGAGGCTGTTAACAACTGGTTTTAGAGGCTGTTGATT 503  
 13V08313/IRL/2013 CAGCGTTCGCCAATACTATAGAGGAGGCTGTTAACAACTGGTTTTAGAGGCTGTTGATT 503  
 Obihiro12-1 CAGCGTTCGCCAATACTATAGAGGAGGCTGTTAAATAAACTGGTTTTAGAGGCTGTTGATT 500  
 Obihiro12-2 CAGCGTTCGCCAATACTATAGAGGAGGCTGTTAAATAAACTGGTTTTAGAGGCTGTTGATT 500  
 NC99 CAGCGTTCGCCAATACTATAGAGGAGGCTGTTAACAACTGGTTTTAGAGGCTGTTGATT 540  
 Tokachi09 CAGCGTTCGCTAATACTATAGAGGAGGCTGTTAACAACTGGTTTTAGAGGCTGTTGATT 355

\*\*\*\*\*

11V11708/IRL/2011 TTATTATCTGGCGTAGCCAGAATTTAAATGCTTATGGCTGA 544  
 13V08313/IRL/2013 TTATTATCTGGCGTAGCCAGAATTTAAATGCTTATGGCTGA 544  
 Obihiro12-1 TTATTATCTGGCGTAGCCAGAATTTAAATGCTTATGGCTGA 541  
 Obihiro12-2 TTATTATCTGGCGTAGCCAGAATTTAAATGCTTATGGCTGA 541  
 NC99 TTATTATCTGGCGTAGCCAGAATTTAAATGCTTATGGCTGA 581  
 Tokachi09 TTATTATCTGGCGTAGCCAGAATTTAAATGCTTATGGCTGA 396

\*\*\*\*\*
